# Supplementary material for: Physical activity trajectories and mortality: population based cohort study
Source: PubMed Central journal article supplement (PMC6592407; doi:10.1136/bmj.l2323), 2019-06-26
Supplement: moka047584.ww1.pdf [file moka047584.ww1.pdf]

**Supplementary Table 1.** Analysis of complete cases for associations of mutually-adjusted baseline physical activity energy expenditure (PAEE) and trajectories of physical activity ( $\Delta$ PAEE) with mortality

| <b>Exposures</b>                                       | <b>Model 1:</b><br>Adjustment for<br><b>baseline covariates<br/>&amp; diet</b> | <b>Model 2:</b><br>Additional adjustments<br><b>for changes in<br/>covariates &amp; diet</b> | <b>Model 3:</b><br>Additional adjustments<br><b>for changes in<br/>body mass index</b> | <b>Model 4:</b><br>Additional adjustments<br><b>for changes in blood<br/>pressure and lipids</b> |
|--------------------------------------------------------|--------------------------------------------------------------------------------|----------------------------------------------------------------------------------------------|----------------------------------------------------------------------------------------|--------------------------------------------------------------------------------------------------|
| <b>Baseline PAEE</b> (per 10 kJ/kg/day)                | n=14,599                                                                       | n= 9,222                                                                                     | n= 9,215                                                                               | n= 8,163                                                                                         |
| <b><math>\Delta</math> PAEE</b> (per 1 kJ/kg/day/year) | 171,277 person-years                                                           | 108,751 person-years                                                                         | 108,668 person-years                                                                   | 96,342 person-years                                                                              |
| <b>All-cause Mortality</b>                             | 3,148 deaths                                                                   | 1,923 deaths                                                                                 | 1,921 deaths                                                                           | 1,686 deaths                                                                                     |
| Baseline PAEE                                          | 0.70 (0.63 to 0.77)***                                                         | 0.75 (0.67 to 0.85)***                                                                       | 0.76 (0.67 to 0.85)***                                                                 | 0.74 (0.65 to 0.85)***                                                                           |
| $\Delta$ PAEE                                          | 0.78 (0.73 to 0.84)***                                                         | 0.81 (0.74 to 0.88)***                                                                       | 0.81 (0.74 to 0.88)***                                                                 | 0.79 (0.72 to 0.87)***                                                                           |
| <b>CVD Mortality</b>                                   | 950 deaths                                                                     | 569 deaths                                                                                   | 569 deaths                                                                             | 497 deaths                                                                                       |
| Baseline PAEE                                          | 0.72 (0.60 to 0.86)***                                                         | 0.77 (0.61 to 0.96)*                                                                         | 0.77 (0.62 to 0.97)*                                                                   | 0.70 (0.55 to 0.90)**                                                                            |
| $\Delta$ PAEE                                          | 0.75 (0.66 to 0.86)***                                                         | 0.79 (0.67 to 0.93)**                                                                        | 0.79 (0.67 to 0.93)**                                                                  | 0.76 (0.63 to 0.90)**                                                                            |
| <b>Cancer Mortality</b>                                | 1,091 deaths                                                                   | 693 deaths                                                                                   | 692 deaths                                                                             | 601 deaths                                                                                       |
| Baseline PAEE                                          | 0.80 (0.69 to 0.94)**                                                          | 0.87 (0.72 to 1.06)                                                                          | 0.87 (0.72 to 1.06)                                                                    | 0.91 (0.74 to 1.12)                                                                              |
| $\Delta$ PAEE                                          | 0.88 (0.79 to 0.98)*                                                           | 0.93 (0.81 to 1.07)                                                                          | 0.92 (0.80 to 1.06)                                                                    | 0.93 (0.80 to 1.08)                                                                              |

All hazard ratios (HRs) and 95% confidence intervals (CIs) are for 10 kJ/kg/day differences in baseline PAEE; and for 1 kJ/kg/day per year increase in  $\Delta$ PAEE.

$\Delta$ PAEE = Trajectory of physical activity energy expenditure (PAEE) over time (annual rate of change), derived from within-individual regression of PAEE across all available physical activity assessments. CVD = cardiovascular disease.

**Model 1** is adjusted for age, sex, smoking status, education level, social class, self-rated health, alcohol intake, energy intake, overall diet quality (comprising fruit & vegetables, red & processed meat, fish, wholegrains, refined grains, sugar-sweetened snacks and beverages, ratio of unsaturated-to-saturated fat intake, and sodium) as well as for medical history at baseline (cardiovascular disease, cancer, diabetes, asthma, chronic obstructive pulmonary diseases, and bone fractures).

**Model 2** is adjusted for covariates in Model 1 + time-updated variables for smoking, alcohol intake, energy intake, diet quality and medical history at the 2<sup>nd</sup> clinic visit, as well as period-prevalent heart disease, stroke and cancer from hospital episode statistics up to the final physical activity assessment (3<sup>rd</sup> follow-up).

**Model 3** is adjusted for covariates in Model 2 + body mass index at baseline and at the final physical activity assessment

**Model 4** is adjusted for covariates in Model 3 + systolic and diastolic blood pressure, serum triglycerides, LDL-cholesterol, and HDL-cholesterol at baseline and at the 2<sup>nd</sup> clinic visit.

There was no evidence of an interaction between baseline PAEE and  $\Delta$ PAEE: p=0.50, p=0.68, and p=0.27 for all-cause, cardiovascular and cancer mortality, respectively (based on likelihood ratio tests using Model 4). Asterisks indicate level of statistical significance: \*p<0.05; \*\*p≤0.01; \*\*\*p≤0.001.

**Supplementary Table 2.** Associations of mutually-adjusted baseline physical activity energy expenditure (PAEE) and trajectories of physical activity ( $\Delta$ PAEE) with mortality, with further adjustments for occupational physical activity

| Exposures                        | <b>Model 1:</b>                           | <b>Model 2:</b>                                         | <b>Model 3:</b>                                       | <b>Model 4:</b>                                                 |
|----------------------------------|-------------------------------------------|---------------------------------------------------------|-------------------------------------------------------|-----------------------------------------------------------------|
|                                  | Adjustment for baseline covariates & diet | Additional adjustments for changes in covariates & diet | Additional adjustments for changes in body mass index | Additional adjustments for changes in blood pressure and lipids |
| Baseline PAEE (per 10 kJ/kg/day) | n=14,599                                  | n= 14,599                                               | n= 14,587                                             | n= 13,360                                                       |
| $\Delta$ PAEE (per 1 kJ/kg/day)  | 171,277 person-years                      | 171,277 person-years                                    | 171,138 person-years                                  | 156,075 person-years                                            |
| <b>All-cause Mortality</b>       | 3,148 deaths                              | 3,148 deaths                                            | 3,145 deaths                                          | 2,840 deaths                                                    |
| Baseline PAEE                    | 0.71 (0.62 to 0.81)***                    | 0.72 (0.63 to 0.82)***                                  | 0.73 (0.64 to 0.83)***                                | 0.73 (0.64 to 0.84)***                                          |
| $\Delta$ PAEE                    | 0.81 (0.73 to 0.89)***                    | 0.80 (0.73 to 0.89)***                                  | 0.81 (0.73 to 0.89)***                                | 0.80 (0.72 to 0.88)***                                          |
| <b>CVD Mortality</b>             | 950 deaths                                | 950 deaths                                              | 949 deaths                                            | 850 deaths                                                      |
| Baseline PAEE                    | 0.66 (0.52 to 0.85)***                    | 0.67 (0.52 to 0.86)**                                   | 0.69 (0.54 to 0.88)**                                 | 0.68 (0.52 to 0.89)**                                           |
| $\Delta$ PAEE                    | 0.69 (0.57 to 0.82)***                    | 0.68 (0.57 to 0.82)***                                  | 0.69 (0.57 to 0.83)***                                | 0.66 (0.54 to 0.80)***                                          |
| <b>Cancer Mortality</b>          | 1,091 deaths                              | 1,091 deaths                                            | 1,090 deaths                                          | 977 deaths                                                      |
| Baseline PAEE                    | 0.79 (0.63 to 0.98)*                      | 0.79 (0.64 to 0.99)*                                    | 0.80 (0.64 to 1.00)                                   | 0.78 (0.62 to 0.99)*                                            |
| $\Delta$ PAEE                    | 0.95 (0.82 to 1.11)                       | 0.95 (0.81 to 1.10)                                     | 0.95 (0.82 to 1.10)                                   | 0.94 (0.80 to 1.10)                                             |

All hazard ratios (HRs) and 95% confidence intervals (CIs) are for 10 kJ/kg/day differences in baseline PAEE; and for 1 kJ/kg/day per year increase in  $\Delta$ PAEE.

$\Delta$ PAEE = Trajectory of physical activity energy expenditure (PAEE) over time (annual rate of change), derived from within-individual regression of PAEE across all available physical activity assessments. CVD = cardiovascular disease.

**Model 1** is adjusted for age, sex, smoking status, education level, social class, self-rated health, alcohol intake, energy intake, overall diet quality (comprising fruit & vegetables, red & processed meat, fish, wholegrains, refined grains, sugar-sweetened snacks and beverages, ratio of unsaturated-to-saturated fat intake, and sodium) as well as for medical history at baseline (cardiovascular disease, cancer, diabetes, asthma, chronic obstructive pulmonary diseases, and bone fractures).

**Model 2** is adjusted for covariates in Model 1 + time-updated variables for smoking, alcohol intake, energy intake, diet quality and medical history at the 2<sup>nd</sup> clinic visit, as well as period-prevalent heart disease, stroke and cancer from hospital episode statistics up to the final physical activity assessment (3<sup>rd</sup> follow-up).

**Model 3** is adjusted for covariates in Model 2 + body mass index at baseline and at the final physical activity assessment

**Model 4** is adjusted for covariates in Model 3 + systolic and diastolic blood pressure, serum triglycerides, LDL-cholesterol, and HDL-cholesterol at baseline and at the 2<sup>nd</sup> clinic visit. All models are further adjusted for occupational physical activity categories (sedentary or no occupation; standing work; physical work; and heavy manual labour) at baseline and at the final physical activity assessment. There was no evidence of an interaction between baseline PAEE and  $\Delta$ PAEE:  $p=0.83$ ,  $p=0.83$ , and  $p=0.90$  for all-cause, cardiovascular and cancer mortality, respectively (based on likelihood ratio tests on Model 4). Asterisks indicate level of statistical significance: \* $p<0.05$ ; \*\* $p\leq 0.01$ ; \*\*\* $p\leq 0.001$
